# Supplementary material
Source: Springer Nature journal article supplement (http://www.springermedizin.de/resource/supplementary/12968_2011_2617_MOESM7_ESM.pdf/9582342)

**A**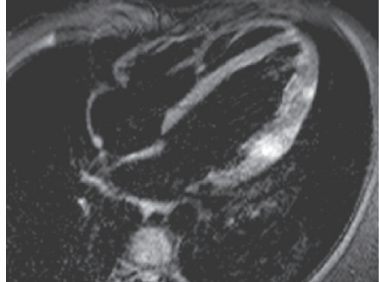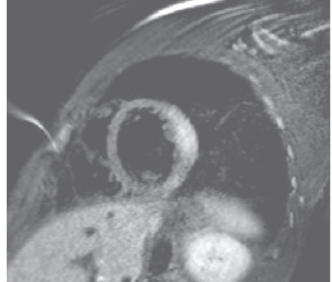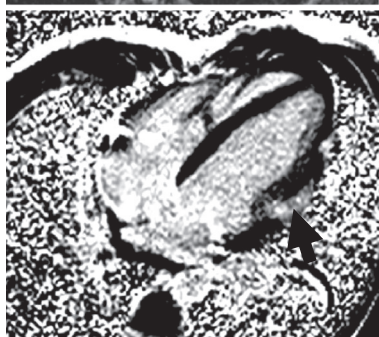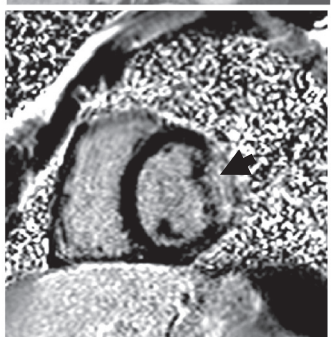**B**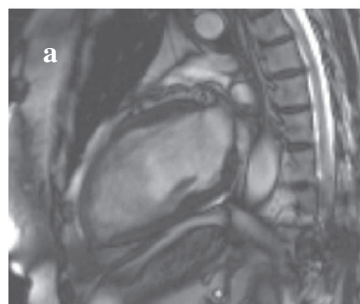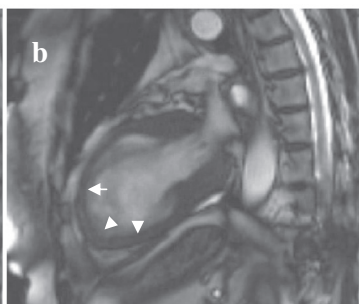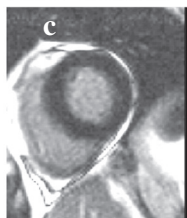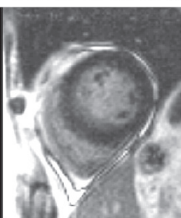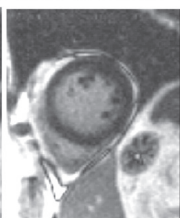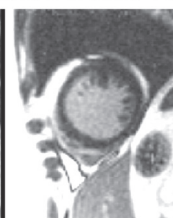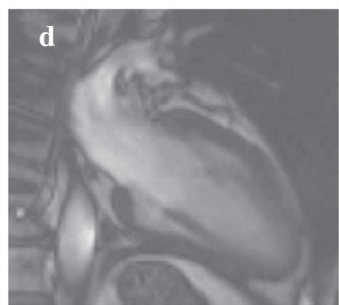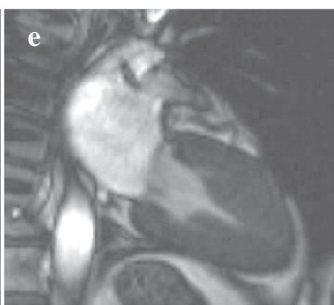

Supplement: MOESM7 [file 9582342]
